# Supplementary material for: Simultaneous electrochemical detection of ascorbic acid, dopamine and uric acid based on nitrogen doped porous carbon nanopolyhedra
Source: Royal Society of Chemistry journal article supplement (doi:10.1039/c3tb20215a), 2013-01-01
Supplement: c3tb20215a.pdf [file c3tb20215a.pdf]

The supplementary information

Table S1 Determination of UA, DA, and AA in urine sample (n=3).

|    | Diluted urine sample (μM) | Spiking (μM) | Found (μM) | R.S.D. <sup>a</sup> (%) | Recovery <sup>b</sup> (%) |
|----|---------------------------|--------------|------------|-------------------------|---------------------------|
| UA | 10.88 <sup>c</sup>        | 10           | 20.78      | 2.9                     | 99                        |
| DA | 0                         | 10           | 10.82      | 3.1                     | 108                       |
| AA | 0                         | 500          | 505.1      | 1.6                     | 101                       |

<sup>a</sup> Relative standard deviation.

5 <sup>b</sup>

$$\text{Recovery} = \frac{\text{Found (uM)} - \text{Diluted urine sample (uM)}}{\text{Spiking (uM)}}$$

<sup>c</sup> Average of three measurements (R.S.D.=3.5%).

Table S2 Surface species content of ZIF-8 NPs and N-PCNPs obtained from XPS results

|           | Species content (atomic %) |       |      |       |
|-----------|----------------------------|-------|------|-------|
|           | C                          | N     | O    | Zn    |
| ZIF-8 NPs | 62.33                      | 21.44 | 3.76 | 12.47 |
| N-PCNPs   | 93.74                      | 1.67  | 4.6  | 0     |

10

Table S3 Comparison of the analytical performance of different modified electrodes for simultaneous determination of AA, DA and UA

| Electrode materials  | Peak separation (mV) |       | Detection limit (μM) |       |       | Linear range (μM) |            |          | Ref.      |
|----------------------|----------------------|-------|----------------------|-------|-------|-------------------|------------|----------|-----------|
|                      | AA-DA                | DA-UA | AA                   | DA    | UA    | AA                | DA         | UA       |           |
| NG <sup>a</sup>      | 200                  | 132   | 2.2                  | 0.25  | 0.045 | 5-1300            | 0.5-170    | 0.1-20   | S1        |
| p-ATD <sup>b</sup>   | 110                  | 152   | 2.01                 | 0.33  | 0.19  | 30-300            | 5-50       | 10-100   | S2        |
| ZnO/RM               | 160                  | 130   | 1.4                  | 0.7   | 4.5   | 15-240            | 6-960      | 50-800   | S3        |
| Pt-Au hybrid         | 150                  | 190   | 103                  | 24    | 21    | 103-165           | 24-384     | 21-336   | S4        |
| PGE <sup>c</sup>     | 222                  | 138   | 13                   | 0.1   | 1.4   | 25-500            | 1-20       | 2.5-30   | S5        |
| Chitosan-graphene    | 165                  | 90    | 50                   | 1     | 2     | 50-1200           | 1-24       | 2-45     | S6        |
| Pt/MWCNT             | 166                  | 120   | 20                   | 0.048 | 0.35  | 24.5-765          | 0.061-2.03 | 0.455-50 | S7        |
| GNPs/PI <sup>d</sup> | 184                  | 165   | 2.0                  | 0.08  | 0.5   | 210-1010          | 5-268      | 6-486    | S8        |
| N-PCNPs              | 228                  | 124   | 0.74                 | 0.011 | 0.021 | 80-2000           | 0.5-30     | 4-50     | This work |

15

<sup>a</sup> Nitrogen doped graphene

20 <sup>b</sup> Electropolymerized film of 2-amino-1,3,4-thiadiazole

<sup>c</sup> Pyrolytic graphite electrode

<sup>d</sup> Gold nanoparticles decorated overoxidized-polyimidazol film

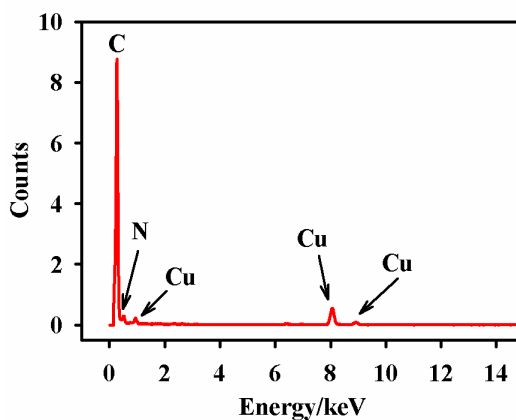

25

Fig. S1 EDS spectra of N-PCNPs. The Cu peaks are derived from TEM sample grid. No Zn-derived peaks are found.

References

- S1. Z.-H. Sheng, X.-Q. Zheng, J.-Y. Xu, W.-J. Bao, F.-B. Wang and X.-H. Xia, *Biosens. Bioelectron.*, 2012, **34**, 125-131.
- S2. P. Kalimuthu and S. A. John, *Talanta*, 2010, **80**, 1686-1691.
- S3. C.-F. Tang, S. A. Kumar and S.-M. Chen, *Anal. Biochem.*, 2008, **380**, 174-183.
- 5 S4. S. Thiagarajan and S.-M. Chen, *Talanta*, 2007, **74**, 212-222.
- S5. R. P. da Silva, A. W. O. Lima and S. H. P. Serrano, *Anal. Chim. Acta*, 2008, **612**, 89-98.
- S6. D. Han, T. Han, C. Shan, A. Ivaska and L. Niu, *Electroanalysis*, 2010, **22**, 2001-2008.
- S7. Z. Dursun and B. Gelmez, *Electroanalysis*, 2010, **22**, 1106-1114.
- S8. C. Wang, R. Yuan, Y. Chai, S. Chen, F. Hu and M. Zhang, *Anal. Chim. Acta*, 2012, **741**, 15-20.
